# Supplementary material
Source: Springer Nature journal article supplement (https://www.springermedizin.de/resource/supplementary/12888_2013_1370_MOESM1_ESM.pdf/9480038)
Supplement: MOESM1 [file 9480038]

**Additional file 1 – Diurnal cortisol activity in women exposed to childhood abuse (CHA) and DVA**

| <b>Research (year), country</b> | <b>n =</b> | <b>Type of abuse</b>            | <b>Cortisol protocol</b>                                            | <b>Mental health measures</b> | <b>Findings</b>                                                                                                                                                                                                                                      |
|---------------------------------|------------|---------------------------------|---------------------------------------------------------------------|-------------------------------|------------------------------------------------------------------------------------------------------------------------------------------------------------------------------------------------------------------------------------------------------|
| Altemus et al (2003) [27]       | 31         | Physical and sexual CHA         | 1 plasma sample + 6 saliva samples every 3 hours from 8:00 to 23:00 | PTSD, MDD, anxiety            | 1) Salivary and plasma cortisol levels <b>did not differ</b> between PTSD patients and comparison subjects; 2) No difference in mean salivary or plasma cortisol in patients with PTSD and comorbid major depression and in those without depression |
| Seedat et al (2003), USA [28]   | 38         | Physical and/or sexual IPV, CHA | 1 morning plasma sample between 09:00-12:00                         | PTSD                          | 1) Women with IPV trauma had significantly <b>lower</b> cortisol compared with controls; 2) Cortisol levels were not significantly correlated with PTSD symptom measures.                                                                            |

| Research (year), country              | n = | Type of abuse                            | Cortisol protocol                                         | Mental health measures | Findings                                                                                                                                                                                                                                  |
|---------------------------------------|-----|------------------------------------------|-----------------------------------------------------------|------------------------|-------------------------------------------------------------------------------------------------------------------------------------------------------------------------------------------------------------------------------------------|
| Newport et al (2004), USA [29]        | 64  | Repeated physical and sexual CHA         | Plasma sample at 08:00                                    | PTSD, MDD, anxiety     | 1) Baseline cortisol was <b>lower</b> in CHA survivors without MDD compared to non-abused controls.                                                                                                                                       |
| Pico-Alfonso et al (2004), Spain [30] | 162 | Physical, sexual, psychological IPV, CHA | 4 consecutive days<br>2 saliva samples at 08:00 and 20:00 | PTSD, MDD, anxiety     | 1) IPV survivors had <b>higher</b> levels of evening cortisol; 2) IPV was the main factor predicting the alterations in cortisol levels; 3) Mental health status did not have a mediating effect on the impact of IPV on cortisol levels. |
| Griffin et al (2005), USA [31]        | 84  | Physical, sexual, psychological IPV      | 1 morning plasma sample at 09:00-09:15                    | PTSD, MDD              | 1) Baseline cortisol levels in IPV survivors with PTSD and those with PTSD plus depression were significantly <b>lower</b> than the baseline cortisol levels of                                                                           |

| Research (year), country        | n = | Type of abuse                       | Cortisol protocol                                           | Mental health measures | Findings                                                                                                                                                                                                                                                                            |
|---------------------------------|-----|-------------------------------------|-------------------------------------------------------------|------------------------|-------------------------------------------------------------------------------------------------------------------------------------------------------------------------------------------------------------------------------------------------------------------------------------|
|                                 |     |                                     |                                                             |                        | the IPV survivors with no diagnosis and controls.                                                                                                                                                                                                                                   |
| Inslicht et al (2006), USA [32] | 49  | Physical, sexual, emotional IPV     | 4 saliva samples at 1,4,9,11 h after awakening              | PTSD, MDD              | 1) The PTSD group had <b>higher</b> levels of cortisol than IPV controls without PTSD; 2) More recent abuse was associated with higher cortisol; 3) Cortisol levels did not differ significantly between women with a sole diagnosis of PTSD and those who had PTSD and depression. |
| Johnson et al (2008), USA [33]  | 52  | Physical, sexual, psychological IPV | 4 saliva samples: awakening and 30-45-60 min post-awakening | PTSD, MDD              | 1) IPV-related PTSD severity is associated with a significantly <b>greater</b> cortisol output the first hour after awakening; 2) More chronic abuse is associated with lower CAR; 3) PTSD severity and                                                                             |

| Research<br>(year),<br>country | n = | Type of abuse | Cortisol protocol | Mental<br>health<br>measures | Findings                                                                                                                                                      |
|--------------------------------|-----|---------------|-------------------|------------------------------|---------------------------------------------------------------------------------------------------------------------------------------------------------------|
|                                |     |               |                   |                              | <p>abuse chronicity did not significantly correlate; 4)</p> <p>There were no significant interactions between PTSD severity and abuse chronicity for CAR.</p> |
